# Supplementary material for: α-Crystallin Domains of Five Human Small Heat Shock Proteins (sHsps) Differ in Dimer Stabilities and Ability to Incorporate Themselves into Oligomers of Full-Length sHsps
Source: MDPI journal article supplement (doi:10.3390/ijms24021085), 2023-01-06
Supplement: s1 [file s1]

**A**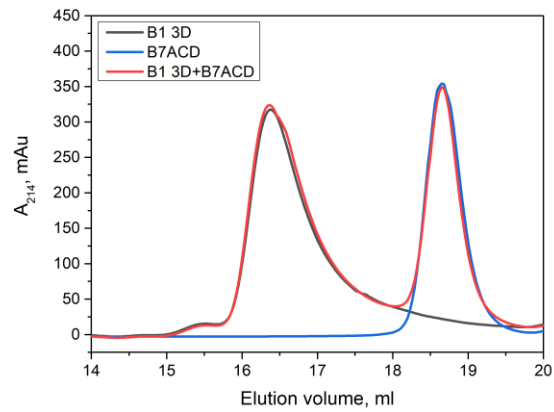**B**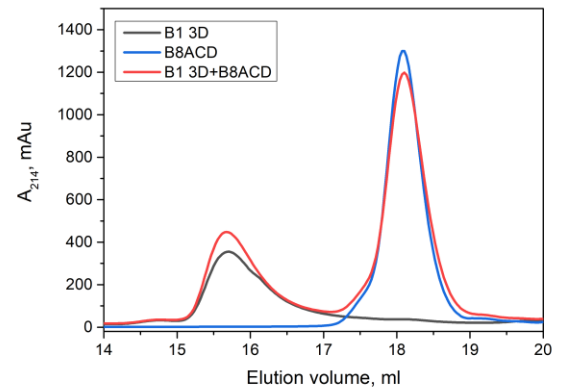

**Supplementary Material Figure S2.** Interaction of B7ACD (A) and B8ACD (B) with HspB1 3D. Size-exclusion chromatography of 3D mutant of HspB1 (black lines), B7ACD and B8ACD (blue lines) and the equimolar mixture of 3D mutant and B7ACD or B8ACD (red lines). Representative results of no less than three experiments are presented.
