# Supplementary material for: α-Crystallin Domains of Five Human Small Heat Shock Proteins (sHsps) Differ in Dimer Stabilities and Ability to Incorporate Themselves into Oligomers of Full-Length sHsps
Source: MDPI journal article supplement (doi:10.3390/ijms24021085), 2023-01-06
Supplement: s1 [file s1]

**Supplementary Material Table S2.** Some properties of five  $\alpha$ -crystallin domains analyzed in this work

|                | Total number of residues | Mol. Mass, Da | pI   |
|----------------|--------------------------|---------------|------|
| B1ACD (84-170) | 87                       | 9703          | 5.46 |
| B5ACD (64-150) | 87                       | 9953          | 6.21 |
| B6ACD (64-149) | 86                       | 9390          | 5.73 |
| B7ACD (71-154) | 84                       | 9156          | 4.97 |
| B8ACD (85-171) | 87                       | 9569          | 5.65 |
