# Supplementary material for: α-Crystallin Domains of Five Human Small Heat Shock Proteins (sHsps) Differ in Dimer Stabilities and Ability to Incorporate Themselves into Oligomers of Full-Length sHsps
Source: MDPI journal article supplement (doi:10.3390/ijms24021085), 2023-01-06
Supplement: s1 [file s1]

**Supplementary Material Table S1.** Primers used for obtaining constructs coding for  $\alpha$ -crystallin domains

| Primer                 | Sequence 5`->3`                                             |
|------------------------|-------------------------------------------------------------|
| HspB1-ACD-84-fw-NdeI   | agatata <b>catatg</b> gggagtatcagaaatacgtcacacagctgaccgctgg |
| HspB1-ACD-170-rev-XhoI | gat <b>cctcgag</b> ttagggcatgggggcctccacgg                  |
| HspB5-ACD-64-fw-NdeI   | gat <b>ccatatg</b> ggactctcagagatgcgcct                     |
| HspB5-ACD-150-rev-XhoI | gat <b>cctcgag</b> ttatttccttggtccattcacagt                 |
| HspB6-ACD-64-fw-NdeI   | gat <b>ccatatg</b> gtcgccaggtgccgacggac                     |
| HspB6-ACD-149-rev-XhoI | gat <b>cctcgag</b> tta cgctggtgcggcctggatgga                |
| HspB7-ACD-71-fw-NdeI   | gat <b>ccatatg</b> ggggcaggcaacatcaagacccta                 |
| HspB7-ACD-154-rev-XhoI | gat <b>cctcgag</b> ttagtgacgccgtgcccgatagt                  |
| HspB8-ACD-85-fw-NdeI   | agatata <b>catatg</b> ggaagaacaccaccaccatttcccggagaaccctgg  |
| HspB8-ACD-171-rev-XhoI | gat <b>cctcgag</b> ttagacctggggagcttcgatgatcagc             |

Bold case letters highlight restriction sites
