# Supplementary material for: α-Crystallin Domains of Five Human Small Heat Shock Proteins (sHsps) Differ in Dimer Stabilities and Ability to Incorporate Themselves into Oligomers of Full-Length sHsps
Source: MDPI journal article supplement (doi:10.3390/ijms24021085), 2023-01-06
Supplement: s1 [file s1]

**B1ACD** 5 models

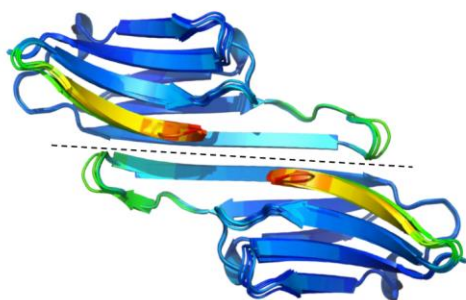

**B8ACD** 5 models

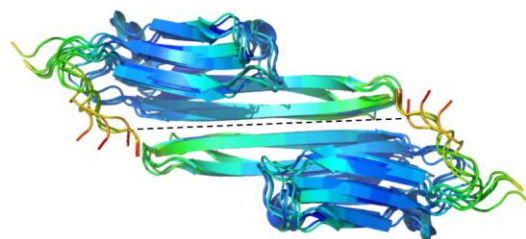

**B5ACD** 5 models

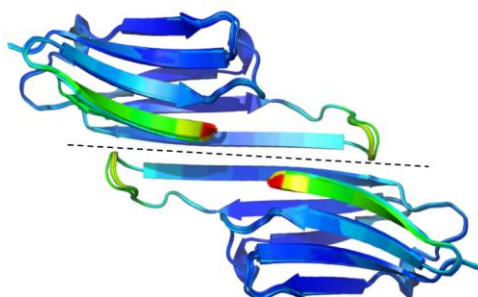

**B7ACD** 3 models  
 $\beta 7/\beta 7$  interface

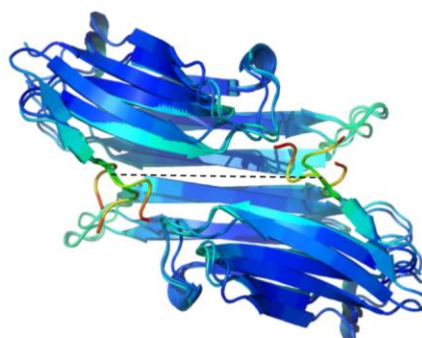

**B6ACD** 5 models

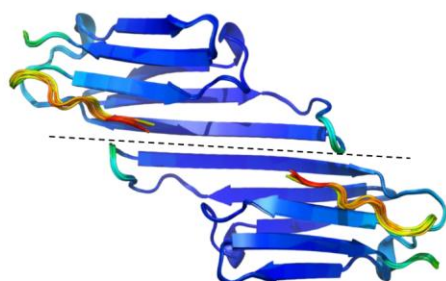

**B7ACD** 2 models  
 $\beta 4/\beta 8$  interface

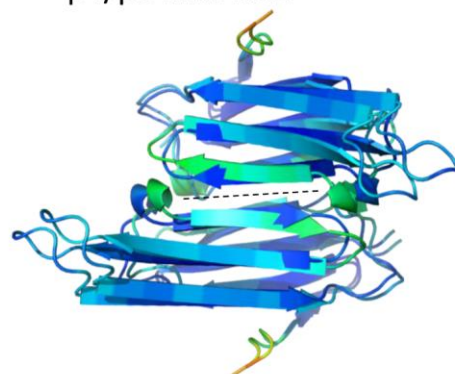

**Supplementary Material Figure S5.** AlphaFold models of different ACDs colored by per-residue confidence score (pLDDT)
