# Supplementary material for: α-Crystallin Domains of Five Human Small Heat Shock Proteins (sHsps) Differ in Dimer Stabilities and Ability to Incorporate Themselves into Oligomers of Full-Length sHsps
Source: MDPI journal article supplement (doi:10.3390/ijms24021085), 2023-01-06
Supplement: s1 [file s1]

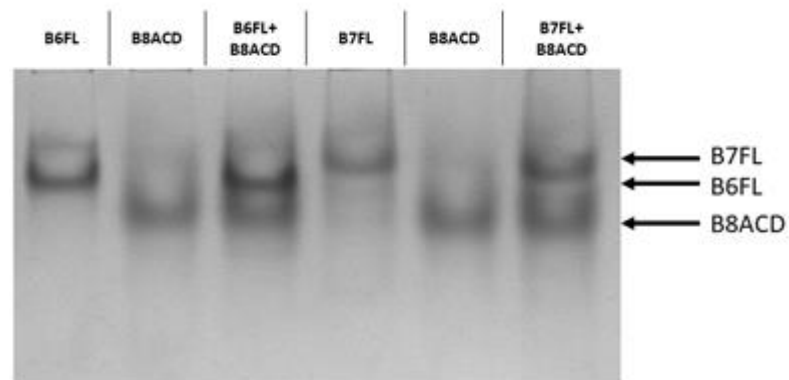

**Supplementary Material Figure S3.** Interaction of full-length HspB6 (B6FL) and full-length HspB7 (B7FL) with B8ACD studied by native PAGE. Positions of full-length proteins and crystallin domains are marked by arrows. Representative results of no less than five experiments are presented.
