# Supplementary material for: α-Crystallin Domains of Five Human Small Heat Shock Proteins (sHsps) Differ in Dimer Stabilities and Ability to Incorporate Themselves into Oligomers of Full-Length sHsps
Source: Int J Mol Sci. 2023 Jan 6;24(2):1085. doi: 10.3390/ijms24021085 (PMC9860685; doi:10.3390/ijms24021085)
Supplement: Supplementary file 1 [file ijms-24-01085-s001.zip]

Archive with 7 entries (7 files):
- ijms-2055539-Supplementary Material Figure S1.pdf
- ijms-2055539-Supplementary Material Figure S2.pdf
- ijms-2055539-Supplementary Material Figure S3.pdf
- ijms-2055539-Supplementary Material Figure S4.pdf
- ijms-2055539-Supplementary Material Figure S5.pdf
- ijms-2055539-Supplementary Material Table S1.pdf
- ijms-2055539-Supplementary Material Table S2.pdf
